# Supplementary material for: Surface zwitterionization on versatile hydrophobic interfaces via a combined copolymerization/self-assembling process
Source: Royal Society of Chemistry journal article supplement (doi:10.1039/c8tb01054d), 2018-01-01
Supplement: c8tb01054d1.pdf [file c8tb01054d1.pdf]

Electronic Supplementary Material (ESI) for Journal of Materials Chemistry B.  
This journal is © The Royal Society of Chemistry 2018

## Electronic Supplementary Information (ESI)

### **Surface zwitterionization on versatile hydrophobic interfaces via a combined copolymerization/self-assembling process**

Ying-Nien Chou<sup>a</sup>, Antoine Venault<sup>a\*</sup>, Yu-Hsiang Wang<sup>a</sup>, Arunachalam Chinnathambi<sup>c</sup>, Akon Higuchi<sup>c</sup> and Yung Chang<sup>a,b\*</sup>

a. R&D Center for Membrane Technology and Department of Chemical Engineering, Chung Yuan Christian University, Chung-Li, Taoyuan 320, Taiwan. \*E-mails:

avenault@cycu.edu.tw(A.V.), ychang@cycu.edu.tw (Y.C.)

b. Department of Botany and Microbiology, College of Science, King Saud University, P.O. Box 2455, Riyadh 11451, Saudi Arabia.

c. Department of Chemical and Materials Engineering, National Central University, Jhong-Li, Taoyuan 320, Taiwan

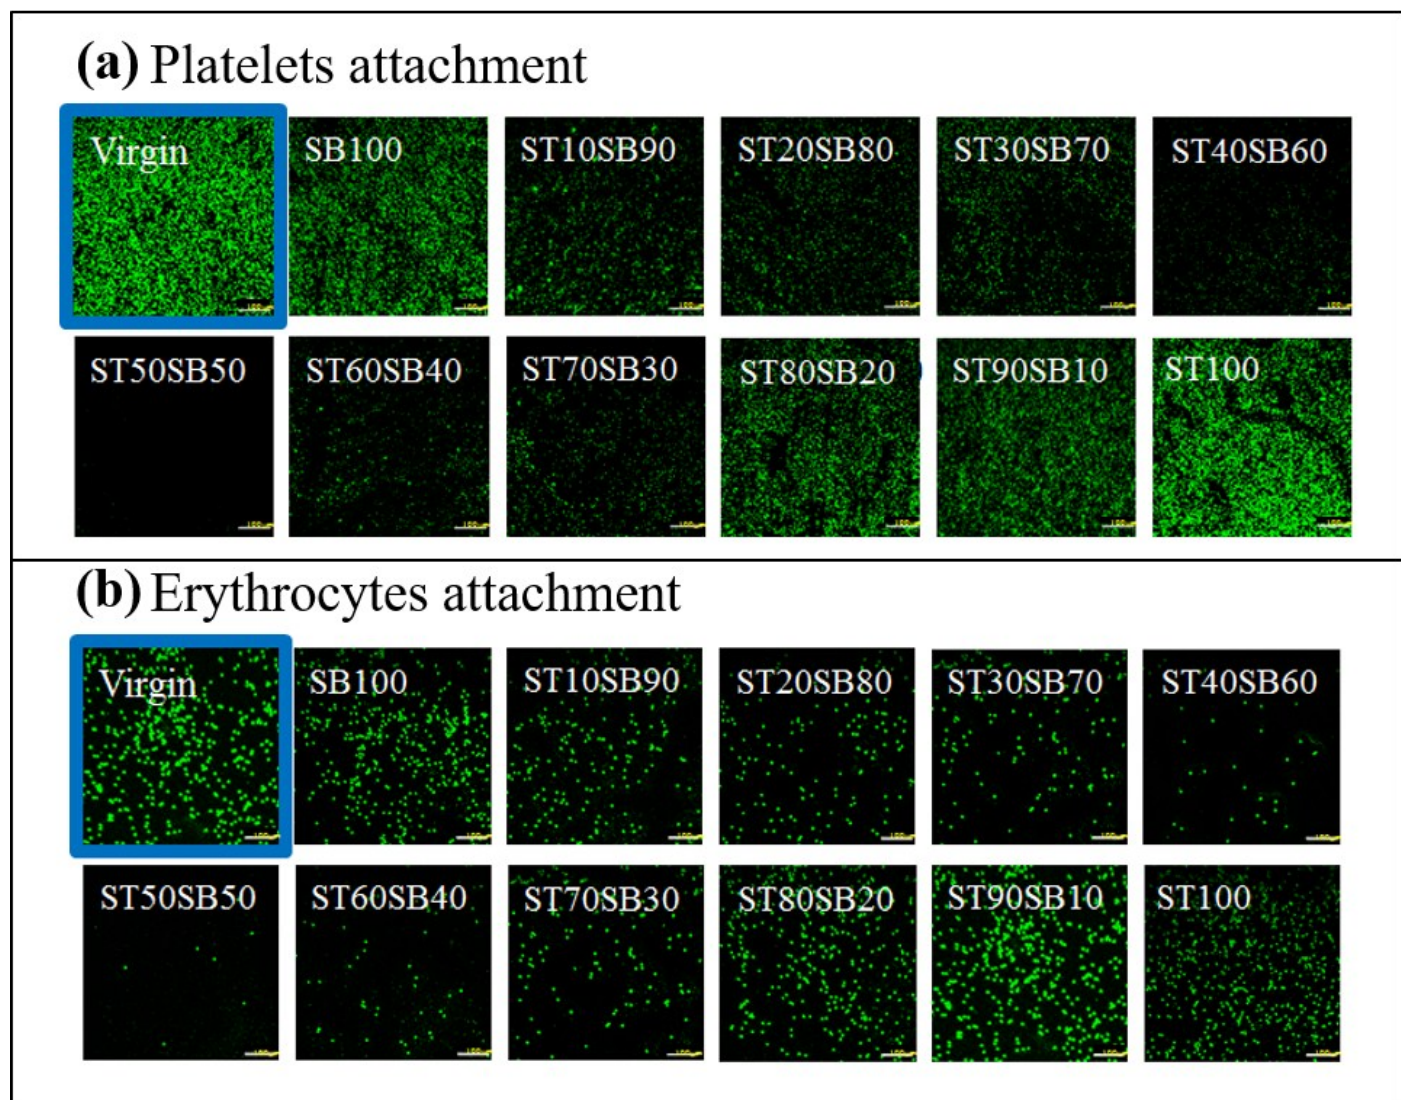

**Figure S1.** Confocal images evidencing the adhesion of (a) platelets and (b) red blood cells on virgin and *in-situ* self-assembled surfaces (M:I = 100:1, solid content: 5 wt%, reaction time: 4h)

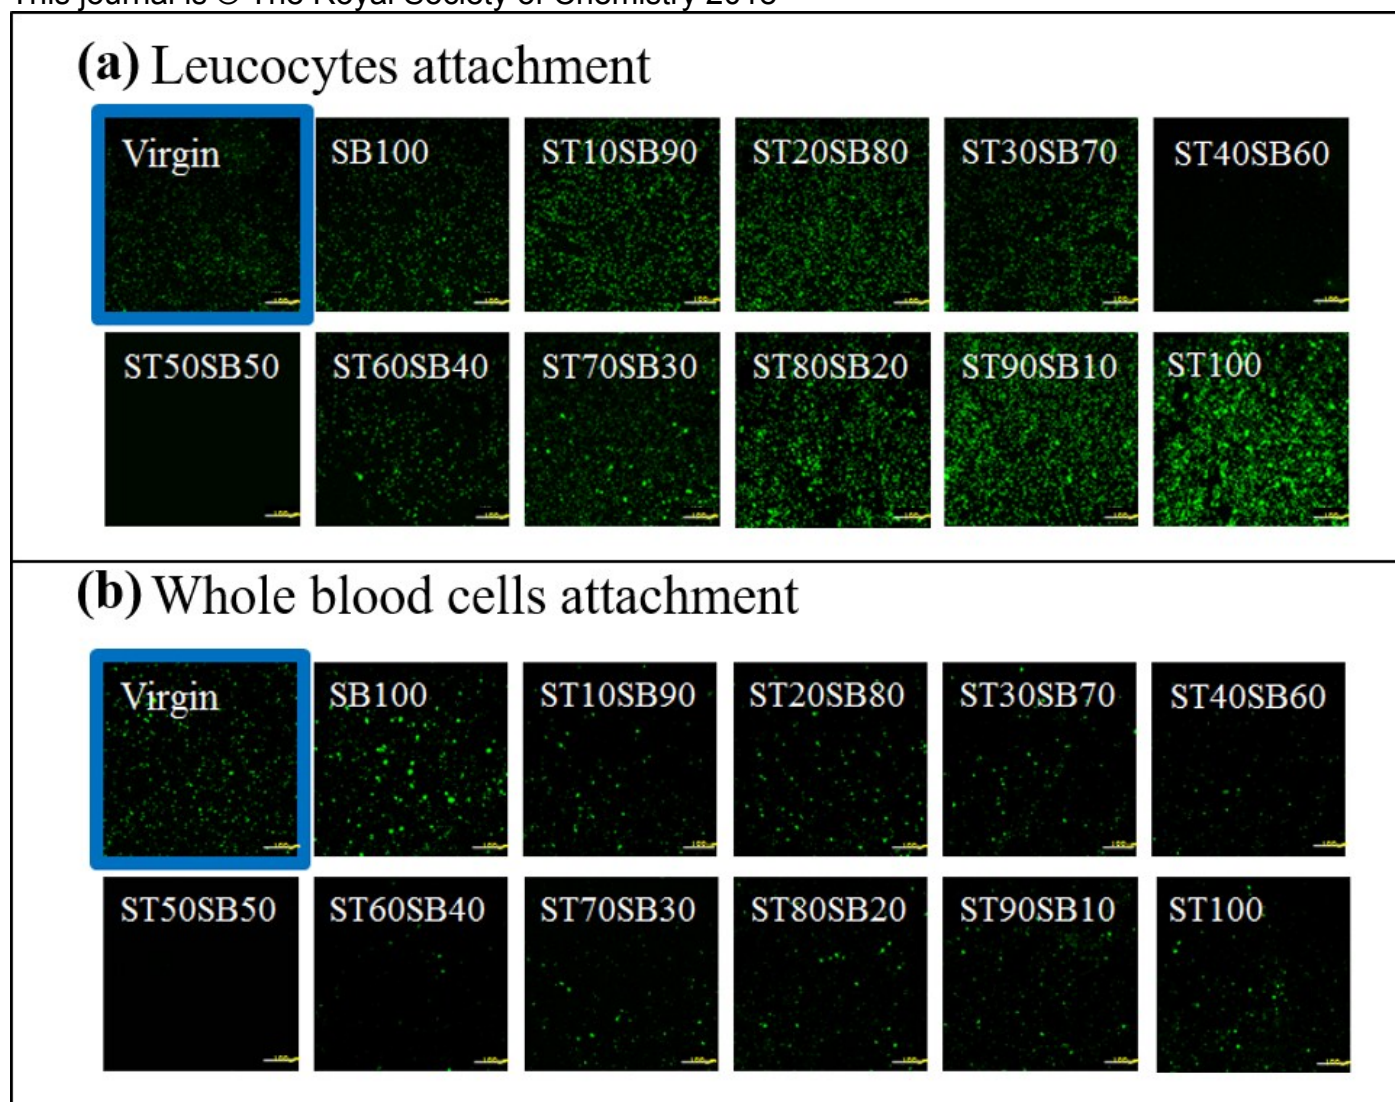

**Figure S2.** Confocal images evidencing the adhesion of (a) leucocytes and (b) cells from whole blood on virgin and *in-situ* self-assembled surfaces (M:I = 100:1, solid content: 5 wt%, reaction time: 4h).

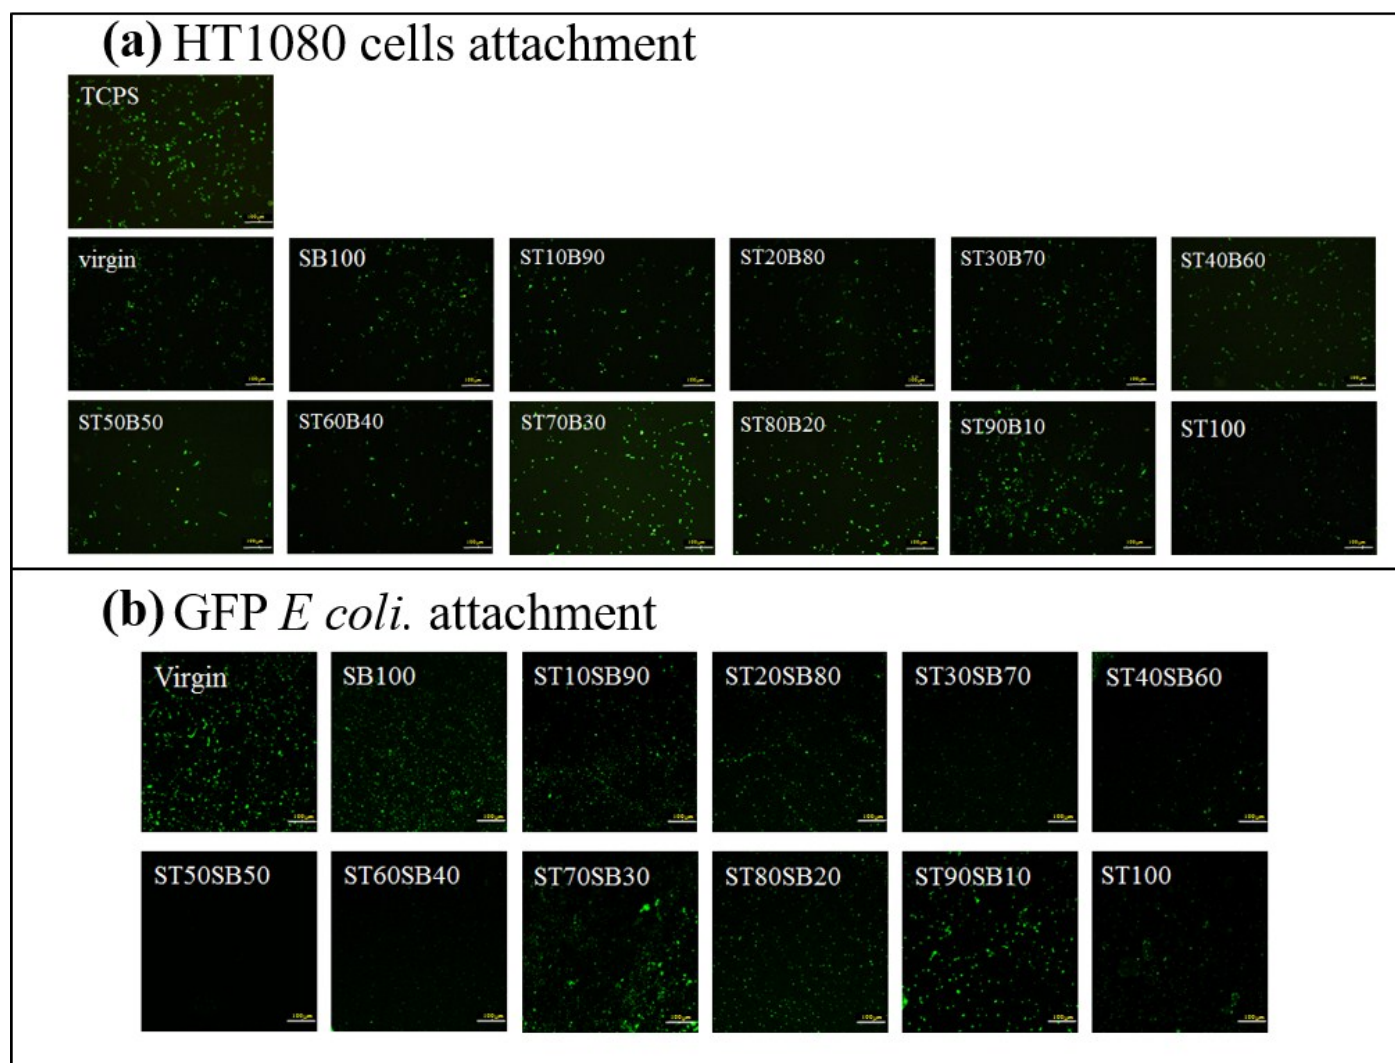

**Figure S3.** The adhesion of (a) HT1080 fibroblasts and (b) GFP *E. coli* on virgin and *in-situ* self-assembled surfaces (M:I = 100:1, solid content: 5 wt%, reaction time: 4h).

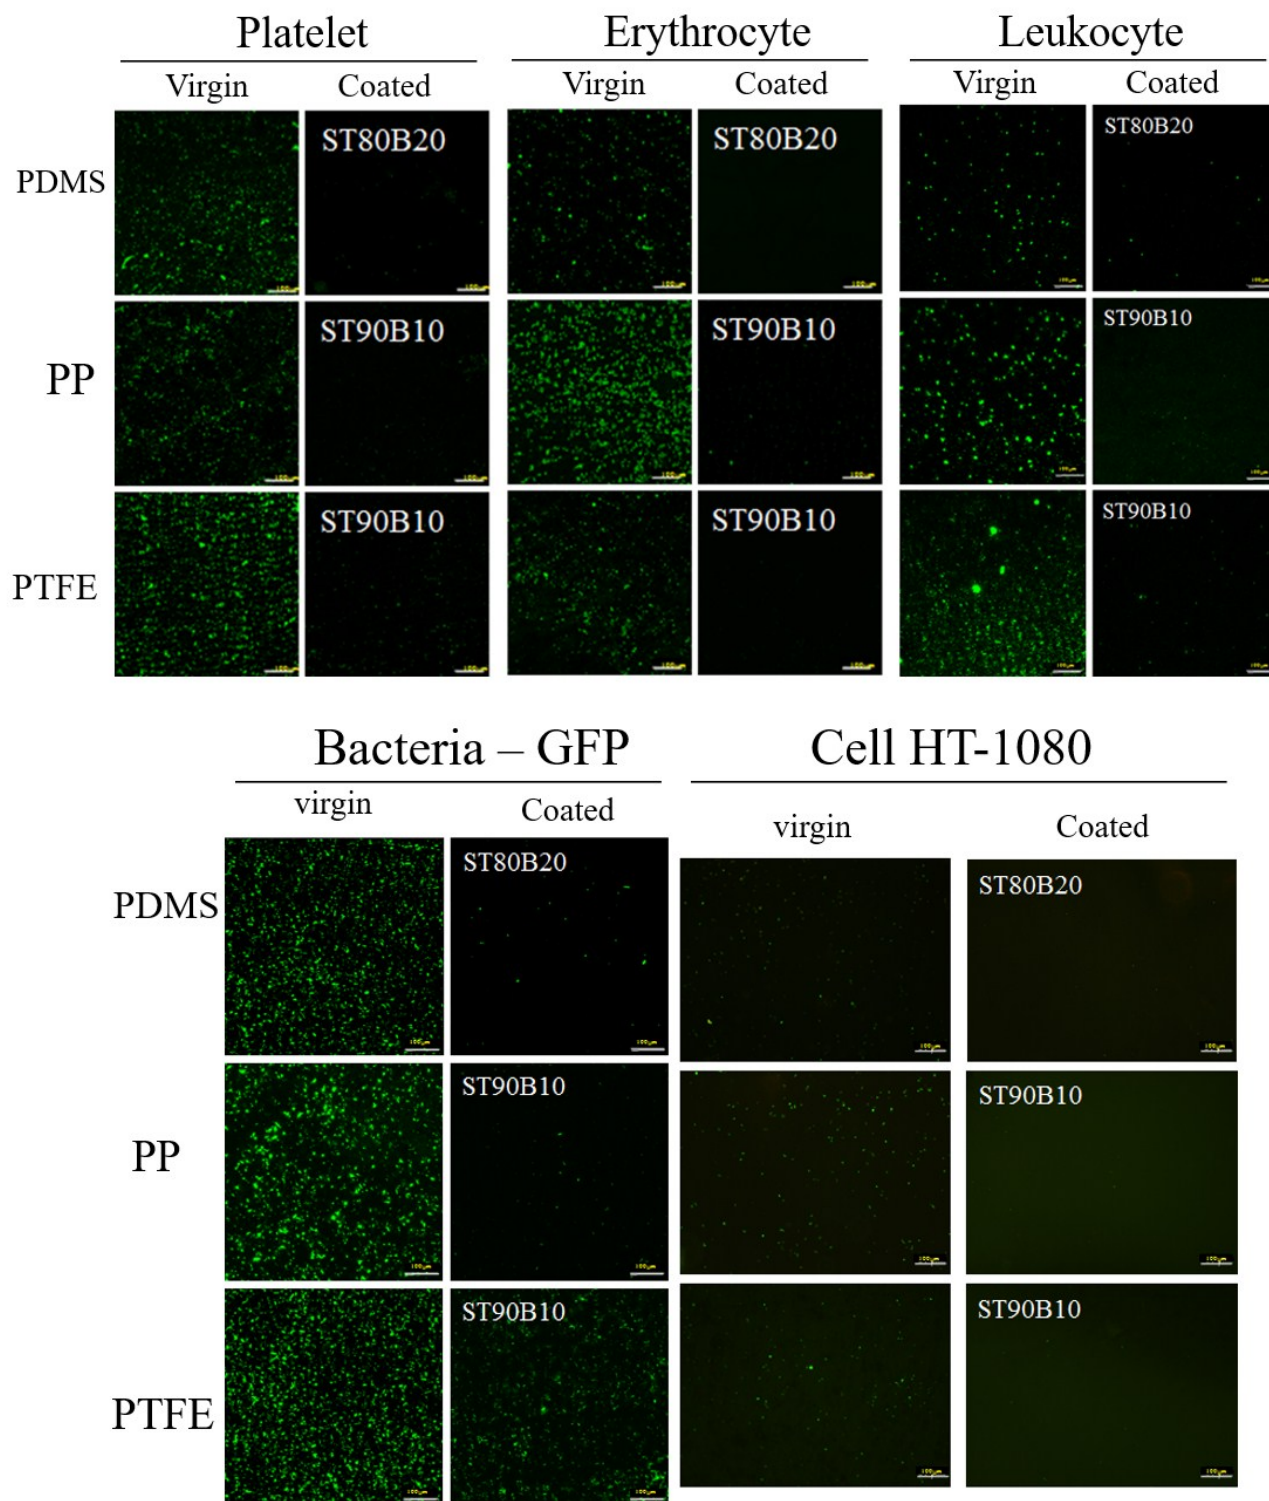

**Figure S4.** The adhesion of (a) HT1080 fibroblasts and (b) GFP E. coli on virgin and *in-situ* self-assembled surfaces (M:I = 100:1, solid content: 5 wt%, reaction time: 4h).
